# Supplementary material for: Construction of an “environment-friendly” CuBx@PU self-supporting electrode toward efficient seawater electrolysis
Source: Royal Society of Chemistry journal article supplement (doi:10.1039/d2gc01819e), 2022-01-01
Supplement: d2gc01819e1.pdf [file d2gc01819e1.pdf]

## Supporting Information

### Construction of "environmental-friendly" $\text{CuB}_x@PU$ self-supporting electrode toward efficient seawater electrolysis

Yiran Zhang<sup>a</sup>, Chengyu Fu<sup>a</sup>, Shuo Weng<sup>a</sup>, Haiyang Lv<sup>a</sup>, Peng Li<sup>a</sup>, Shengwei Deng<sup>b</sup>,

Weiju Hao<sup>a\*</sup>

<sup>a</sup>University of Shanghai for Science and Technology, Shanghai 200093, P. R. China.

<sup>b</sup>College of Chemical Engineering, Zhejiang University of Technology, Hangzhou,  
Zhejiang 310014, P. R. China

*\*Corresponding author.*

E-mail address: wjhao@usst.edu.cn

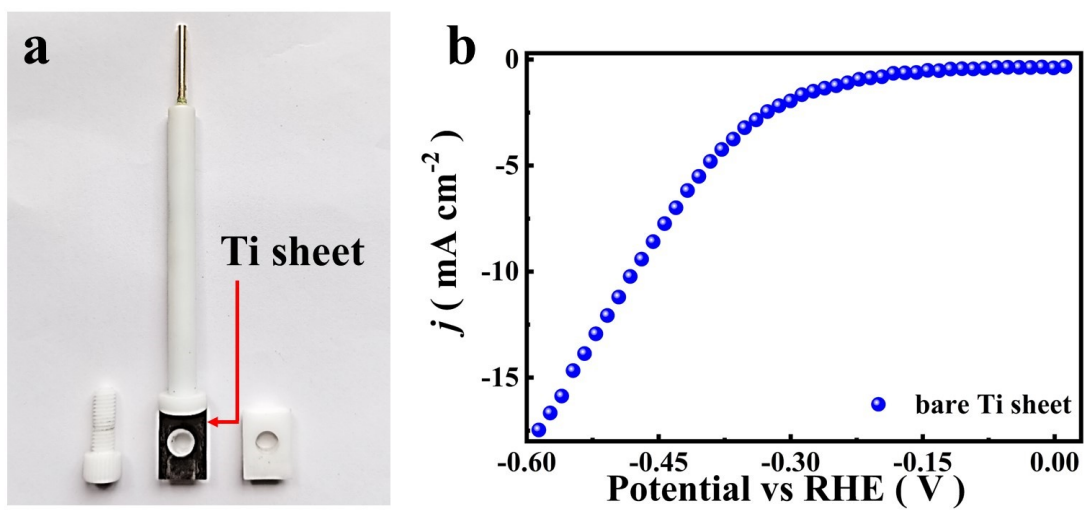

**Figure S1.** (a) Cutaway view of electrode holder; (b) LSV curves of bare Ti sheet.

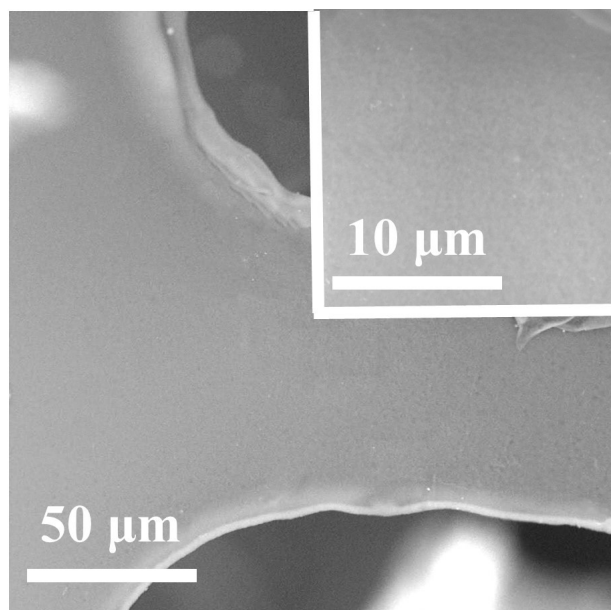

**Figure S2.** SEM images of bare PU substrate.

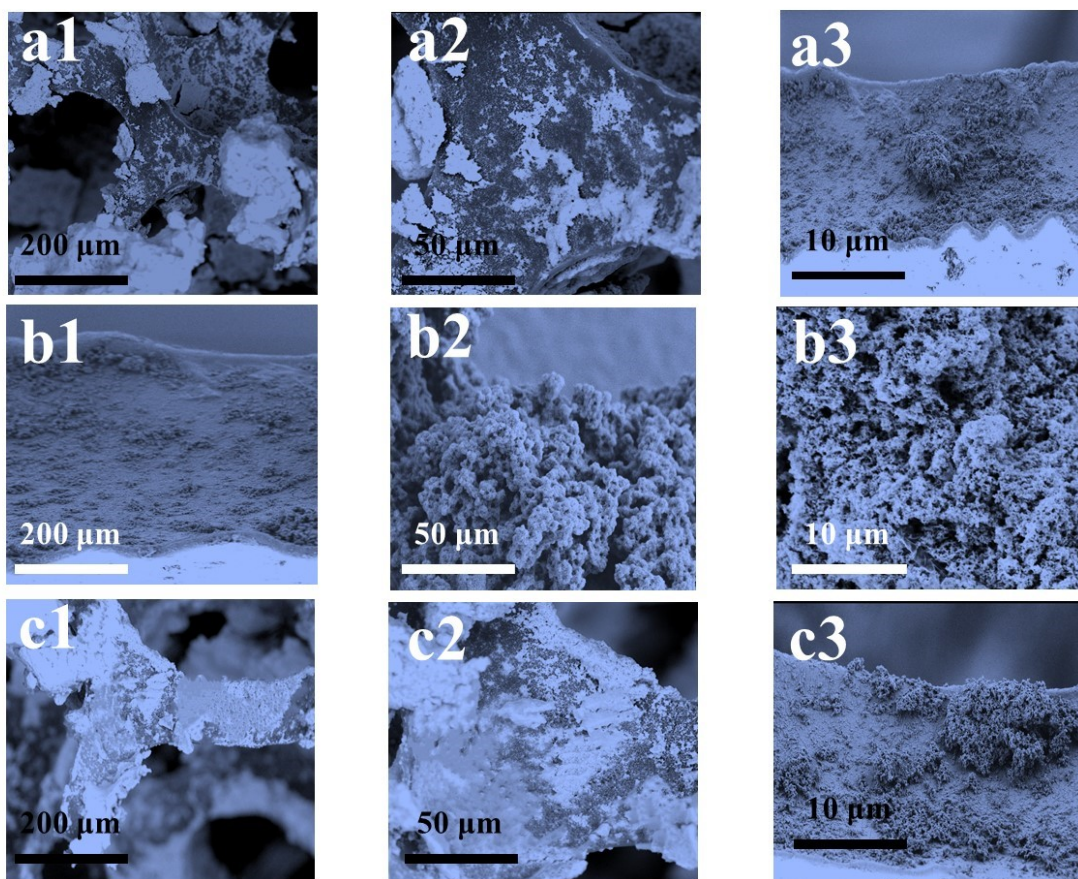

**Figure S3.** SEM images of  $\text{CuB}_x$  on PU substrate with different EP time: (a1, a2, a3)  $\text{CuB}_x@PU$  -30min; (b1, b2, b3)  $\text{CuB}_x@PU$ -60min; (c1, c2, c3)  $\text{CuB}_x@PU$ -90min.

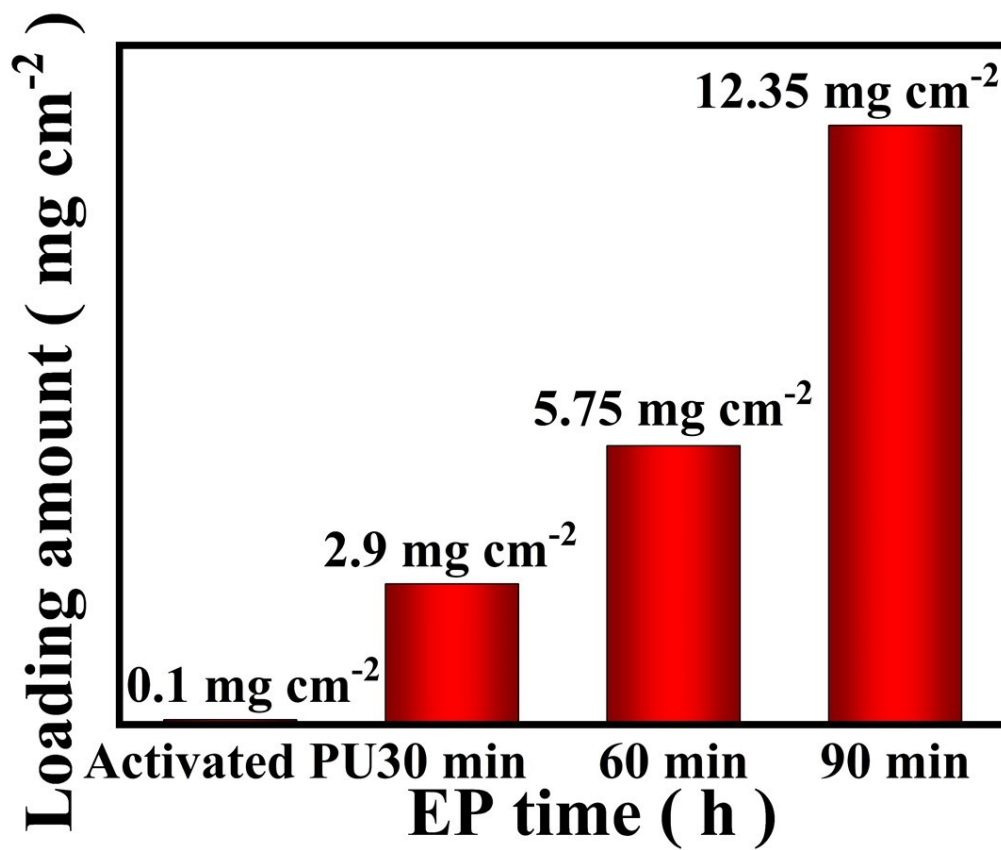

**Figure S4.** Loading amount of  $\text{CuB}_x$  on PU substrate with different EP time.

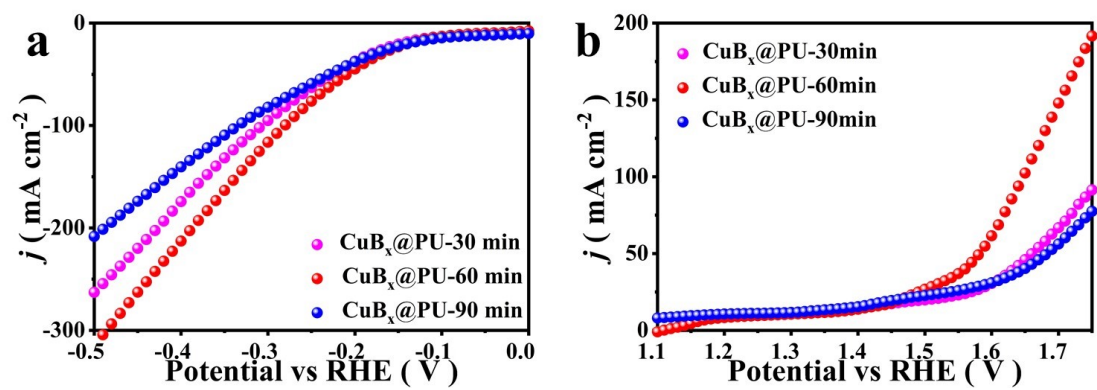

**Figure S5.** LSV curves of CuB<sub>x</sub>@PU electrode with different EP time during (a) HER process and (b) OER process.

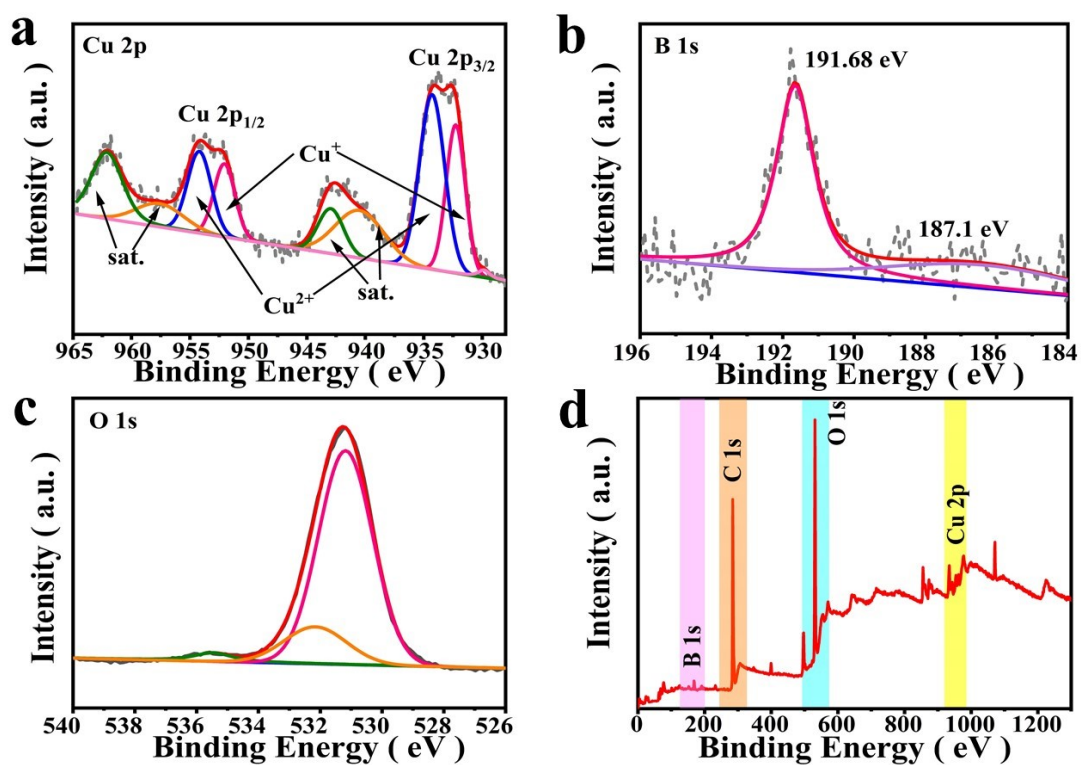

**Figure S6.** High-resolution XPS spectrum for CuB<sub>x</sub>@PU electrode of (a) Cu 2p, (b) B 1s and (c) O 1s; XPS survey spectra of (d) CuB<sub>x</sub>@PU.

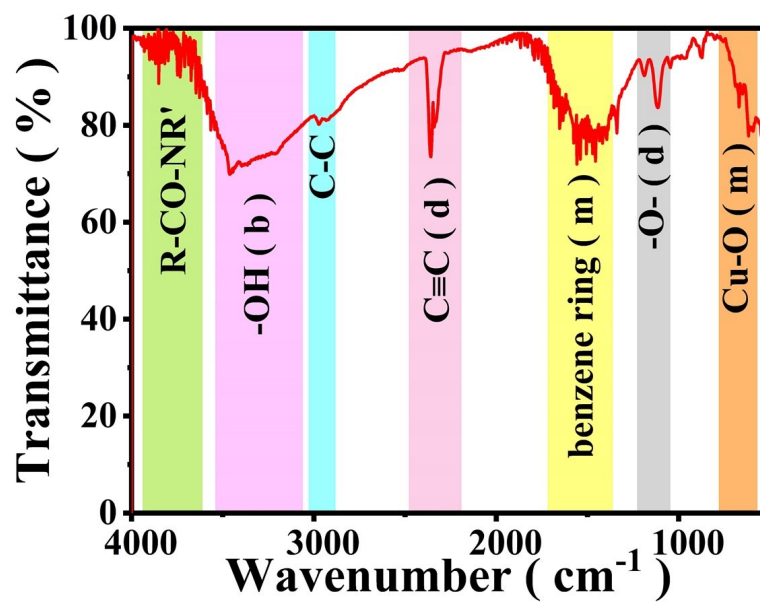

Figure S7. FT-IR spectrum of CuB<sub>x</sub>@PU.



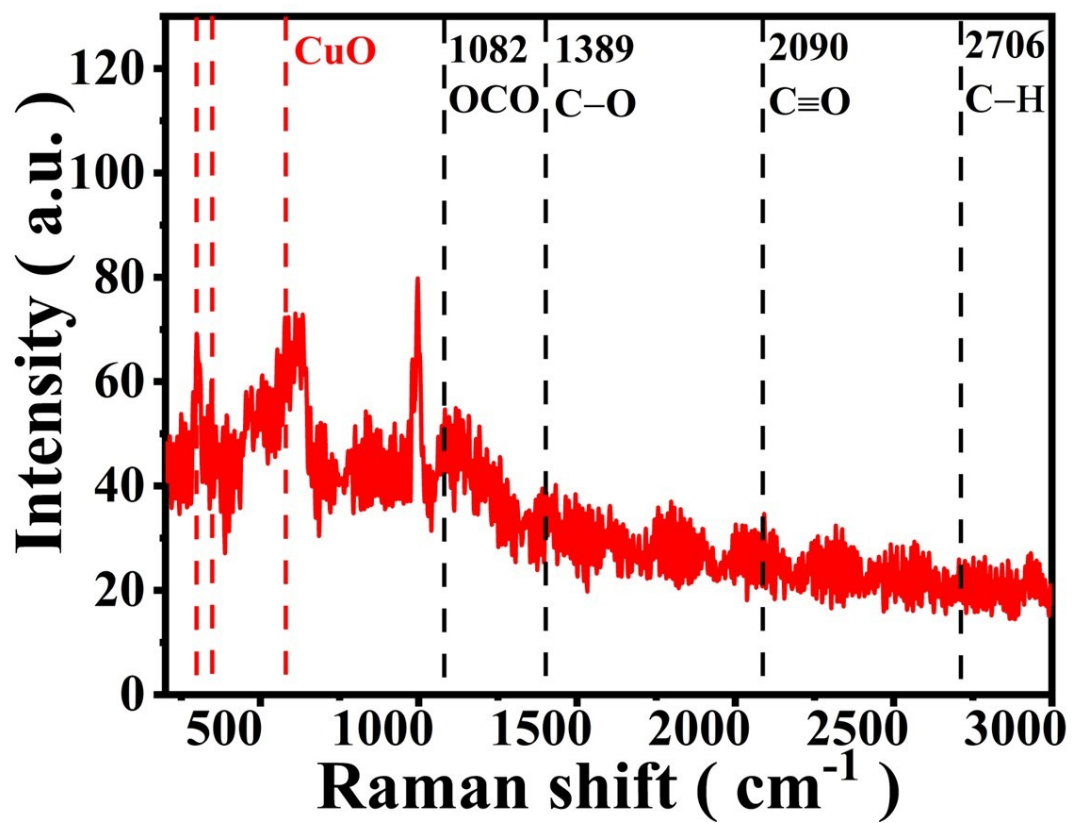

Figure S8. Raman spectrum of CuB<sub>x</sub>@PU under 532 nm excitation.

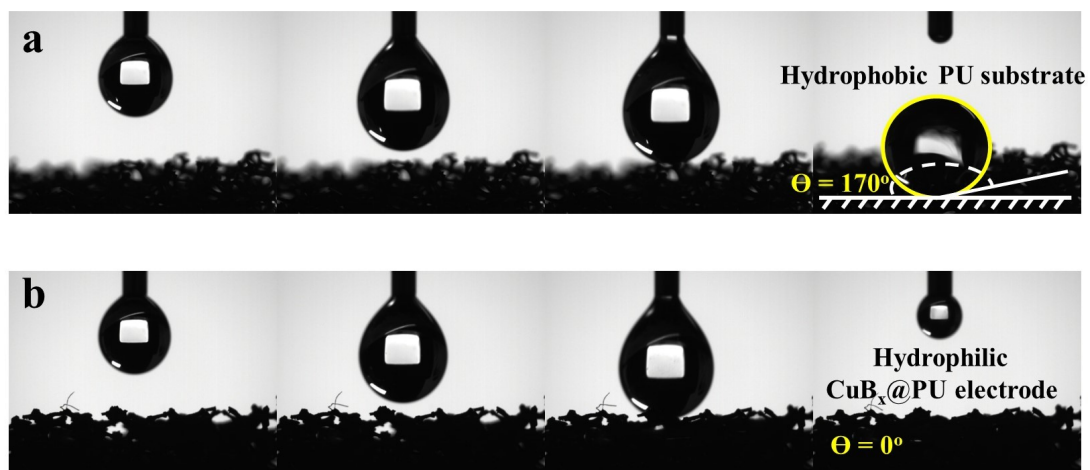

**Figure S9.** Contact angle measurements of (a) bare PU and (b) CuB<sub>x</sub>@PU electrodes.

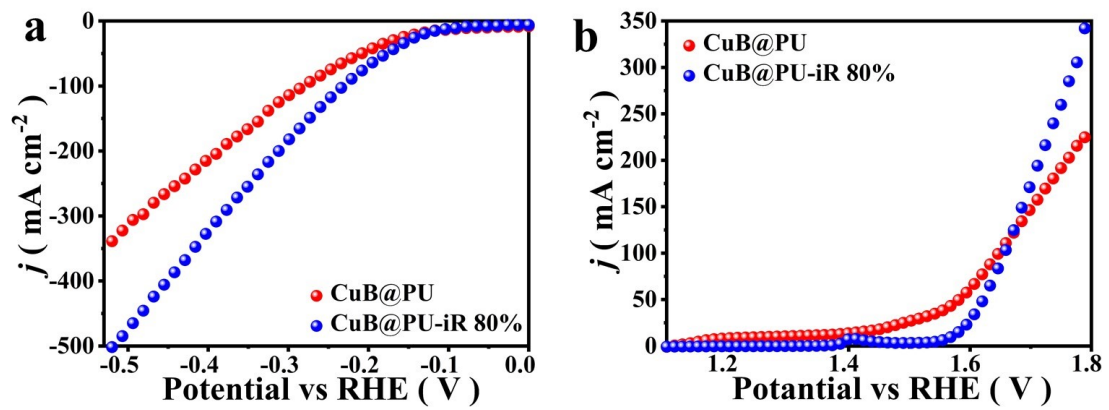

**Figure S10.** Comparison of LSV before and after 80% iR correction (a) HER process and (b) OER process.

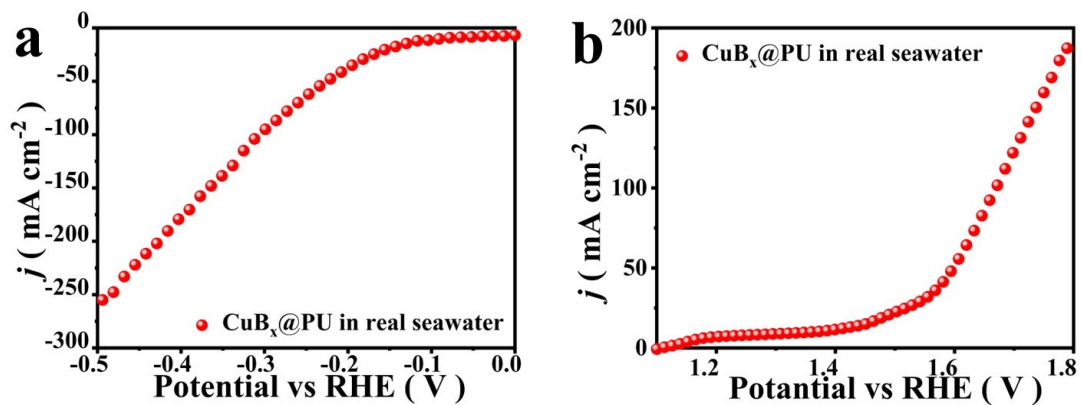

**Figure S11.** LSV curves of  $\text{CuB}_x@PU$  electrode in real seawater (0.5 M NaCl) during (a) HER process and (b) OER process.

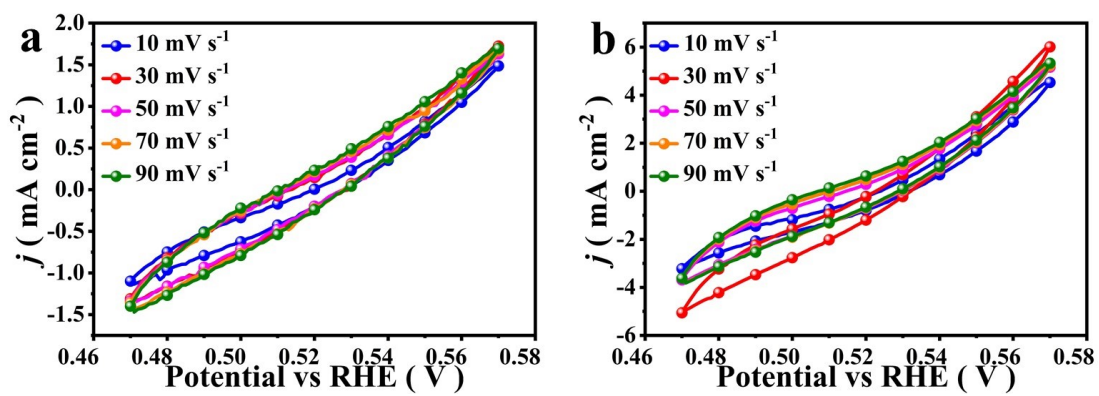

**Figure S12.** CV curves within a non-faradaic reaction region of 0.47 V~0.57 V verses RHE at different scan rates toward HER for (a) CuB<sub>x</sub>@PU (b) CuB<sub>x</sub>@NF.

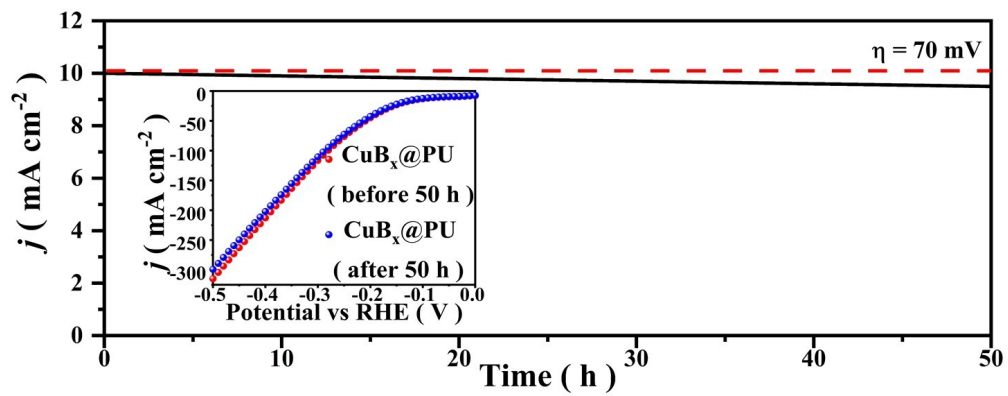

**Figure S13.** Chronopotentiometric measurement of HER at 70 mV. Inset: LSV curves of CuB<sub>x</sub>@PU before and after HER cycles

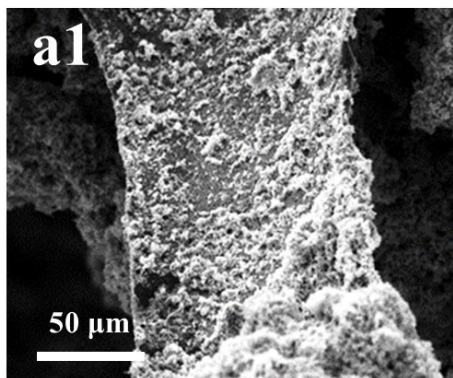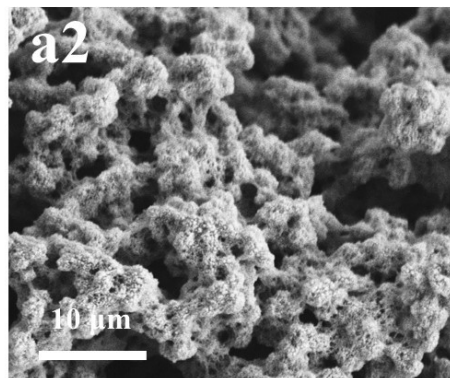

**Figure S14.** SEM images of (a1, a2) post-HER.

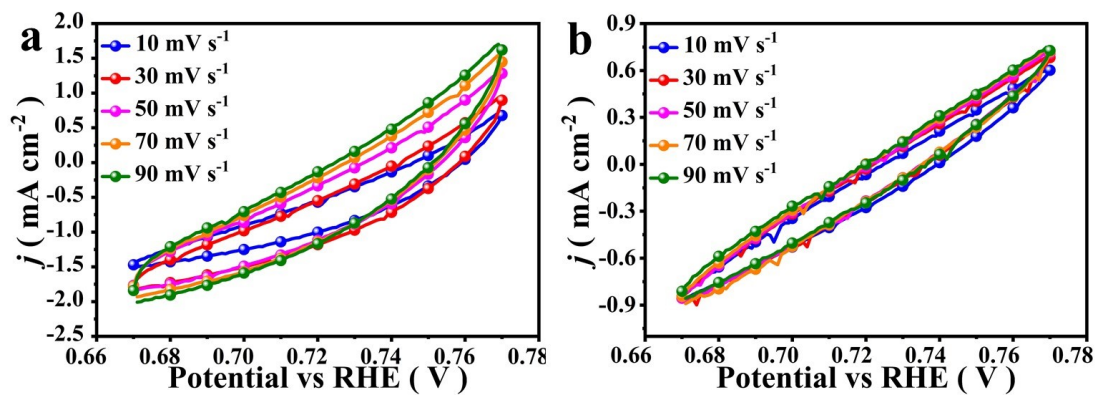

**Figure S15.** CV curves within a non-faradaic reaction region of 0.65 V~0.77 V verses RHE at different scan rates toward OER for (a) CuB<sub>x</sub>@PU and (b) CuB<sub>x</sub>@NF.



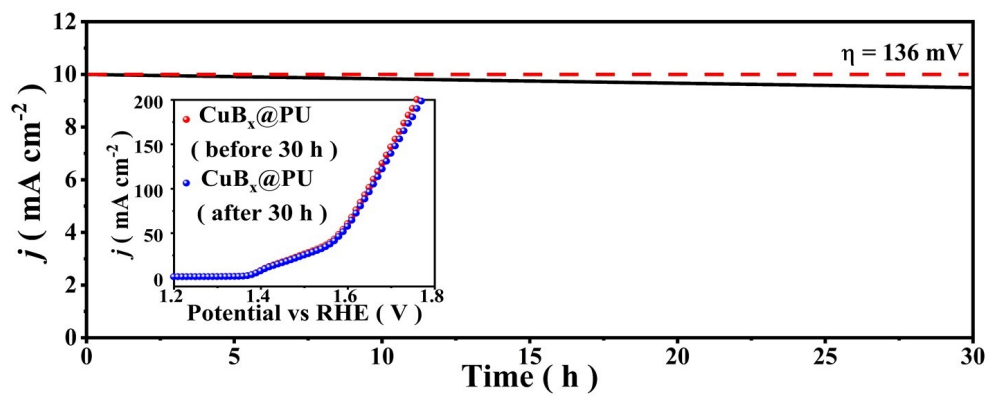

**Figure S16.** Chronopotentiometric measurement of OER at 136 mV. Inset: LSV curves of CuB<sub>x</sub>@PU before and after OER cycles.

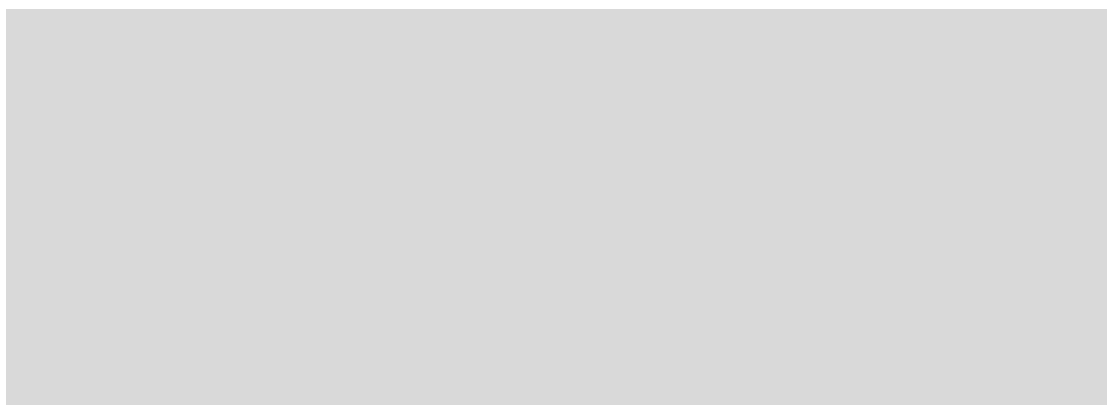

**Figure S17.** SEM images of (a1, a2) post-OER samples.

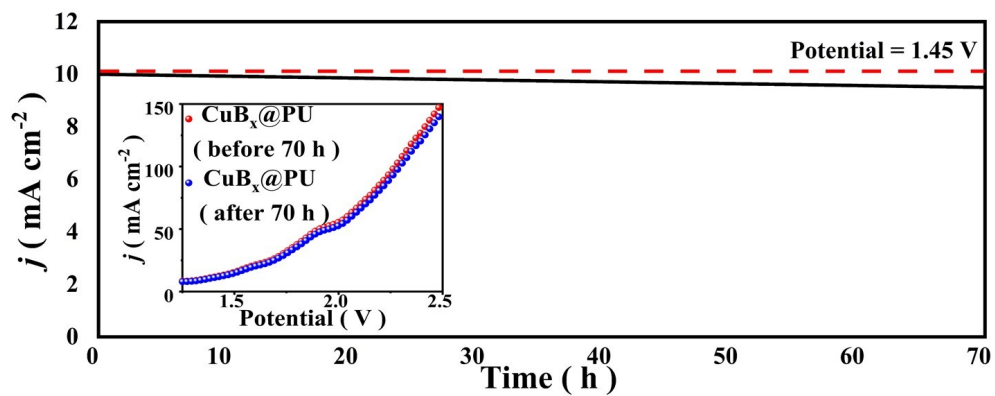

**Figure S18.** Chronopotentiometric measurement of the overall water splitting at the constant potential of 1.45 V. Inset: LSV curves of CuB<sub>x</sub>@PU before and after overall water splitting.

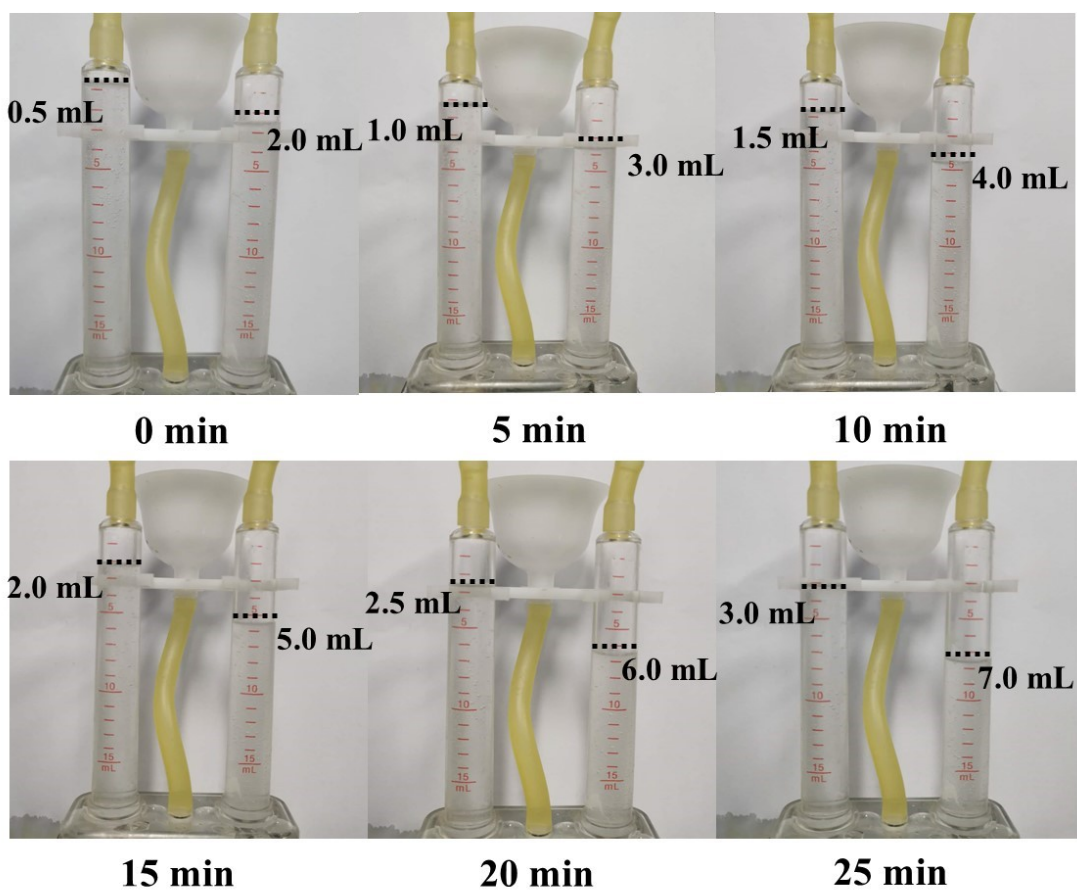

**Figure S19.** Photographs of H<sub>2</sub> and O<sub>2</sub> collected per five minutes at the current density of 100 mA cm<sup>-2</sup>.

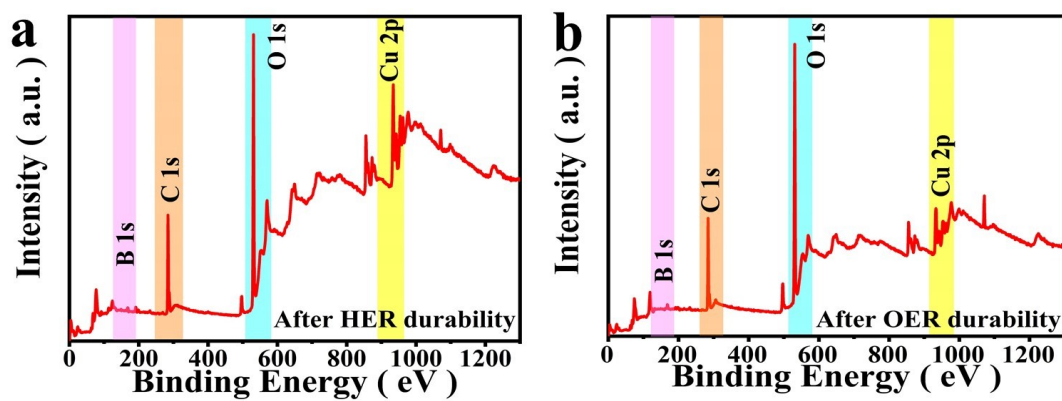

**Figure S20.** XPS survey spectra of (a) post-HER and (b) post-OER samples.

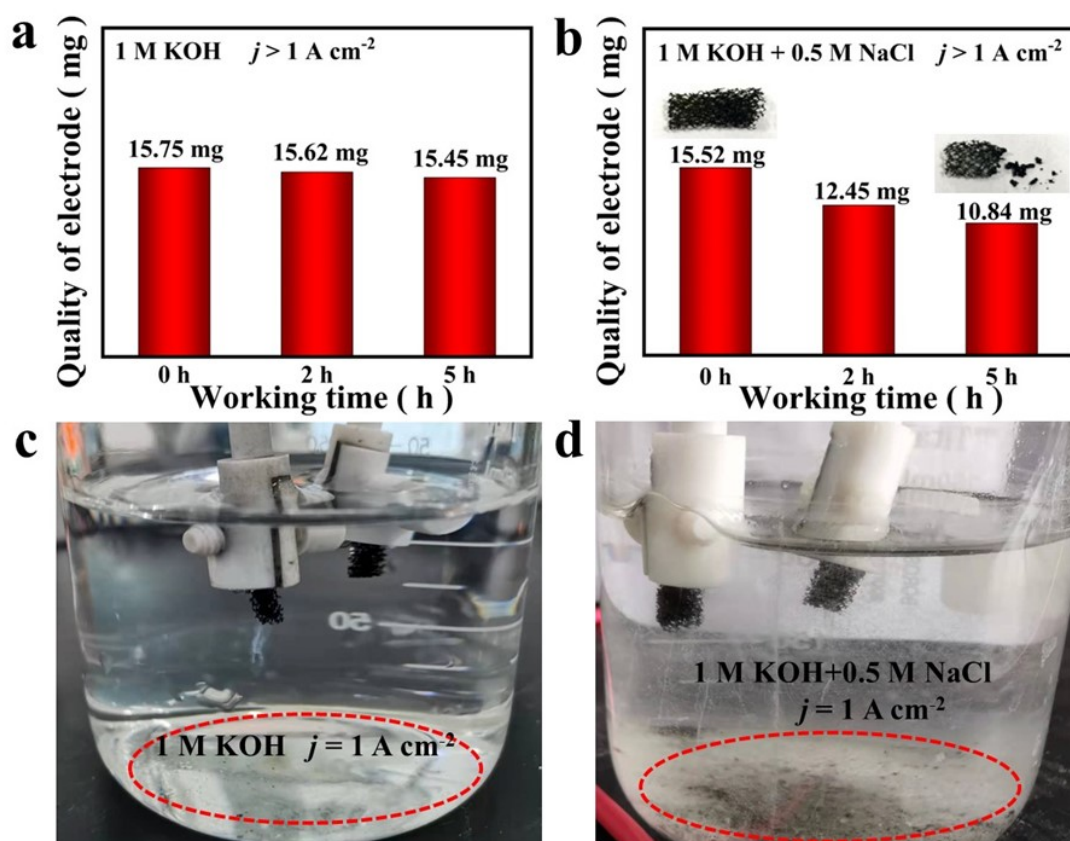

**Figure S21.** (a, b) Quality of  $\text{CuB}_x\text{@PU}$  with different working time at high current density ( $j > 1 \text{ A cm}^{-2}$ ) in the solution of 1M KOH and 1M KOH + 0.5 M NaCl; (c, d) state of 1M KOH and 1M KOH + 0.5 M NaCl electrolytes at high current density ( $j > 1 \text{ A cm}^{-2}$ ).

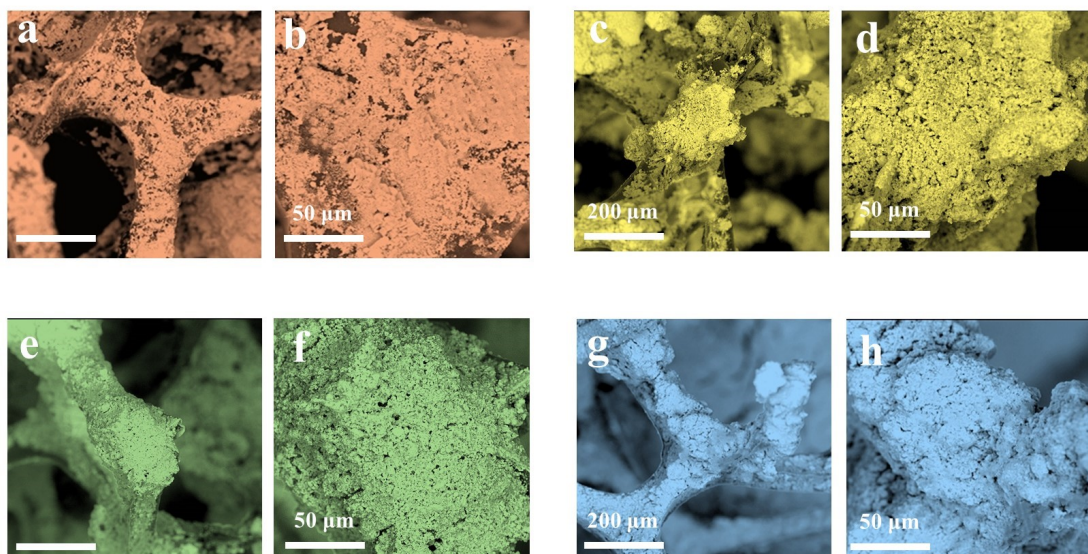

**Figure S22.** SEM images of (a,b) CuB-Mo@PU; (c,d) CuB-P@PU; (e,f) CuB-Ni@PU and (g,h) CuB-Co@PU.

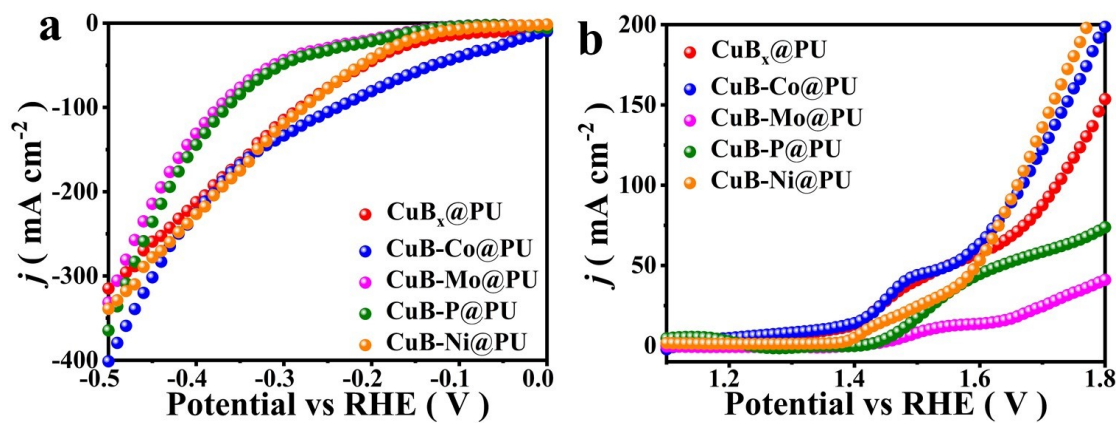

**Figure S23.** LSV curves of CuB<sub>x</sub>@PU electrode doped with other (non)mentals of Co/Mo/P/Ni during (a) HER process and (b) OER process.



## Supporting Tables

**Table S1.** ICP-AES analysis results of CuB<sub>x</sub>-based catalytic electrodes.

| Catalysts                          | Cu   | B     | Co/Mo/Ni/P | Atomic Ratio<br>(Cu:B) |
|------------------------------------|------|-------|------------|------------------------|
| <b>CuB<sub>x</sub>@PU</b>          | 3.23 | 29.80 |            | 1:9.02                 |
| <b>post-HER</b>                    | 1.68 | 15.17 |            | 1:9.09                 |
| <b>post-OER</b>                    | 1.88 | 20.32 |            | 1:11.1                 |
| <b>Co-doped CuB<sub>x</sub>@PU</b> | 1.55 | 24.57 | 5.59       | 1:16.7                 |
| <b>Mo-doped CuB<sub>x</sub>@PU</b> | 0.5  | 10.10 | 0.22       | 1:25.0                 |
| <b>Ni-doped CuB<sub>x</sub>@PU</b> | 1.98 | 37.86 | 5.22       | 1:20.1                 |
| <b>P-doped CuB<sub>x</sub>@PU</b>  | 1.72 | 24.79 | 0.06       | 1:25.2                 |

**Table S2.** Comparison of HER performance of CuB<sub>x</sub>@PU catalyst with recently reported Cu-based catalysts under alkaline conditions.

| Catalysts                                                         | Electrolyte |   | <i>j</i><br>(mA cm <sup>-2</sup> ) | $\eta$<br>(mV) | Loading<br>Amount        | Reference |
|-------------------------------------------------------------------|-------------|---|------------------------------------|----------------|--------------------------|-----------|
|                                                                   | 1.0         | M |                                    |                |                          |           |
| CuB <sub>x</sub> @PU                                              | KOH+0.5     | M | 10                                 | 70             | 5.75 mg cm <sup>-2</sup> | This work |
|                                                                   | NaCl        |   |                                    |                |                          |           |
| Ni-Mo/Cu                                                          | 1.0 M KOH   |   | 20                                 | 152            | 2.17 mg cm <sup>-2</sup> | 1         |
| Cu plate NiFeLDH                                                  | 1.0 M KOH   |   | 10                                 | 116            | 2.2 mg cm <sup>-2</sup>  | 2         |
| Mo-/Co-NC/Cu                                                      | 1.0 M KOH   |   | 100                                | 71             | N/A                      | 3         |
| Co-N-C/Cu                                                         | 1.0 M KOH   |   | 100                                | 155            | N/A                      | 3         |
| Mo-N-C/Cu                                                         | 1.0 M KOH   |   | 100                                | 183            | N/A                      | 3         |
| N-C/Cu                                                            | 1.0 M KOH   |   | 100                                | 21             | N/A                      | 4         |
| RuCu NSs/C                                                        | 1.0 M KOH   |   | 10                                 | 20             | N/A                      | 4         |
| NiCo <sub>2</sub> O <sub>4</sub> /Cu <sub>x</sub> O/Cu            | 1.0 M KOH   |   | 10                                 | 92             | 2.9 mg cm <sup>-2</sup>  | 5         |
| CuNi@NiFeCu                                                       | 1.0 M KOH   |   | 10                                 | 42             | 1.95 mg cm <sup>-2</sup> | 6         |
| CuO <sub>x</sub> @Co <sub>3</sub> O <sub>4</sub> NRs/CF           | 1.0 M KOH   |   | 50                                 | 242            | N/A                      | 7         |
| Pt-Cu@Cu <sub>x</sub> O NWs                                       | 1.0 M KOH   |   | 10                                 | 72             | 18.9 mg cm <sup>-2</sup> | 8         |
| Cu-Ni <sub>3</sub> S <sub>2</sub> /Co <sub>3</sub> S <sub>4</sub> | 1.0 M KOH   |   | 10                                 | 79             | N/A                      | 9         |
| Cu@CoS <sub>x</sub> /CF                                           | 1.0 M KOH   |   | 10                                 | 134            | 3.9 mg cm <sup>-2</sup>  | 10        |
| Cu <sub>3</sub> N@CoNiCHs/CF                                      | 1.0 M KOH   |   | 10                                 | 182            | 6.23 mg cm <sup>-2</sup> | 11        |
| CuFe <sub>2</sub> O <sub>4</sub>                                  | 1.0 M KOH   |   | 10                                 | 103            | 1.66 mg cm <sup>-2</sup> | 12        |
| Cu-Foam@CuCoNC-500                                                | 1.0 M KOH   |   | 10                                 | 59.2           | N/A                      | 13        |
| Cu-CoP NAs/CP                                                     | 1.0 M PBS   |   | 10                                 | 81             | 3.95 mg cm <sup>-2</sup> | 14        |

|                                                                 |                      |    |       |                          |    |
|-----------------------------------------------------------------|----------------------|----|-------|--------------------------|----|
| CoNiMo <sub>4</sub> -21/CuO <sub>x</sub> /CF                    | 1.0 M KOH            | 10 | 46    | N/A                      | 15 |
| Fe-Ni <sub>2</sub> P@PC/Cu <sub>x</sub> S                       | 1.0 M KOH            | 10 | 112.9 | 2.2 mg cm <sup>-2</sup>  | 16 |
| Cu-(a-NiSe <sub>x</sub> /c-NiSe <sub>2</sub> )/TiO <sub>2</sub> | 1.0 M KOH            | 10 | 156.9 | 1.5 mg cm <sup>-2</sup>  | 17 |
| Co-Cu-W                                                         | 1.0 M KOH            | 10 | 100   | 1.25 mg cm <sup>-2</sup> | 18 |
| NiFeO <sub>x</sub> @NiCu                                        | 1.0 M KOH            | 10 | 66    | 0.4 mg cm <sup>-2</sup>  | 19 |
| 1D-Cu@Co-CoO/Rh                                                 | 1.0 M KOH+0.5 M NaCl | 10 | 137.7 | N/A                      | 20 |
| NiP <sub>2</sub> -FeP <sub>2</sub> / Cu-NW / Cu-f               | 1.0 M KOH+0.5 M NaCl | 10 | 23.6  | N/A                      | 21 |

---

**Table S3.** Comparison of OER performance of CuB<sub>x</sub>@PU catalyst with recently reported Cu-based catalysts under alkaline conditions.

| Catalyst                                                          | Electrolyte     | <i>j</i><br>(mA cm <sup>-2</sup> ) | $\eta$<br>(mV) | Loading<br>Amount        | Refer<br>ences |
|-------------------------------------------------------------------|-----------------|------------------------------------|----------------|--------------------------|----------------|
|                                                                   | 1.0 M           | M                                  |                |                          |                |
| CuB <sub>x</sub> @PU                                              | KOH+0.5 NaCl    | M 10                               | 136            | 5.75 mg cm <sup>-2</sup> | This work      |
| Ni-Mo/Cu                                                          | 1.0 M KOH       | 20                                 | 280            | 2.17 mg cm <sup>-2</sup> | 1              |
| Cu plate NiFeLDH                                                  | 1.0 M KOH       | 10                                 | 199            | 2.2 mg cm <sup>-2</sup>  | 2              |
| Mo-/Co-NC/Cu                                                      | 1.0 M KOH       | 100                                | 318            | N/A                      | 3              |
| RuCu NSs/C                                                        | 1.0 M KOH       | 10                                 | 234            | N/A                      | 4              |
| NiCo <sub>2</sub> O <sub>4</sub> /Cu <sub>x</sub> O/Cu            | 1.0 M KOH       | 10                                 | 213            | 2.9 mg cm <sup>-2</sup>  | 5              |
| CuNi@NiFeCu                                                       | 1.0 M KOH       | 50                                 | 285            | 1.95 mg cm <sup>-2</sup> | 6              |
| CuO <sub>x</sub> @Co <sub>3</sub> O <sub>4</sub> NRs/CF           | 1.0 M KOH       | 50                                 | 240            | N/A                      | 7              |
| Pt-Cu@Cu <sub>x</sub> O NWs                                       | 1.0 M KOH       | 10                                 | 250            | 18.9 mg cm <sup>-2</sup> | 8              |
| Cu-Ni <sub>3</sub> S <sub>2</sub> /Co <sub>3</sub> S <sub>4</sub> | 1.0 M KOH       | 50                                 | 160            | N/A                      | 9              |
| Cu@CoS <sub>x</sub> /CF                                           | 1.0 M KOH       | 10                                 | 160            | 3.9 mg cm <sup>-2</sup>  | 10             |
| Cu <sub>3</sub> N@CoNiCHs/CF                                      | 1.0 M KOH       | 10                                 | 155            | 6.23 mg cm <sup>-2</sup> | 11             |
| CuFe <sub>2</sub> O <sub>4</sub>                                  | 1.0 M KOH       | 10                                 | 298            | 1.66 mg cm <sup>-2</sup> | 12             |
| Cu-Foam@CuCoNC-500                                                | 1.0 M KOH       | 10                                 | 245            | N/A                      | 13             |
| Cu-CoP NAs/CP                                                     | 1.0 M PBS (PBS) | 10                                 | 411            | 3.95 mg cm <sup>-2</sup> | 14             |
| CoNiMo <sub>4</sub> -21/CuO <sub>x</sub> /CF                      | 1.0 M KOH       | 10                                 | 221            | N/A                      | 15             |
| Fe-Ni <sub>2</sub> P@PC/Cu <sub>x</sub> S                         | 1.0 M KOH       | 50                                 | 330            | 2.2 mg cm <sup>-2</sup>  | 16             |

|                                                                 |              |      |     |                          |    |
|-----------------------------------------------------------------|--------------|------|-----|--------------------------|----|
| Cu-(a-NiSe <sub>x</sub> /c-NiSe <sub>2</sub> )/TiO <sub>2</sub> | 1.0 M KOH    | 10   | 339 | 1.5 mg cm <sup>-2</sup>  | 17 |
| Co-Cu-W                                                         | 1.0 M KOH    | 10   | 300 | 1.25 mg cm <sup>-2</sup> | 18 |
| NiFeO <sub>x</sub> @NiCu                                        | 1.0 M KOH    | 10   | 300 | 0.4 mg cm <sup>-2</sup>  | 19 |
|                                                                 | 1.0 M        |      |     |                          |    |
| 1D-Cu@Co-CoO/Rh                                                 | KOH+0.5 NaCl | M 10 | 260 | N/A                      | 20 |

---

**Table S4.** Comparison of overall-water splitting performance of CuB<sub>x</sub>@PU catalyst with recently reported Cu-based catalysts under alkaline conditions.

| Catalysts                                                         | Electrolyte                     | <i>j</i><br>(mA cm <sup>-2</sup> ) | Potential<br>(V) | Loading<br>Amount        | Reference |
|-------------------------------------------------------------------|---------------------------------|------------------------------------|------------------|--------------------------|-----------|
|                                                                   | 1.0 M                           |                                    |                  |                          |           |
| CuB <sub>x</sub> @PU                                              | KOH+0.5 M NaCl                  | 10                                 | 1.45             | 5.75 mg cm <sup>-2</sup> | This work |
| Ni-Mo/Cu                                                          | 1.0 M KOH                       | 20                                 | 1.69             | 2.17 mg cm <sup>-2</sup> | 1         |
| Cu plate NiFeLDH                                                  | 1.0 M KOH                       | 10                                 | 1.54             | 2.2 mg cm <sup>-2</sup>  | 2         |
| Mo-/Co-NC/Cu                                                      | 1.0 M KOH                       | 100                                | 1.62             | N/A                      | 3         |
| RuCu NSs/C                                                        | 1.0 M KOH                       | 10                                 | 1.49             | N/A                      | 4         |
| NiCo <sub>2</sub> O <sub>4</sub> /Cu <sub>x</sub> O/Cu            | 1.0 M KOH                       | 10                                 | 1.61             | 2.9 mg cm <sup>-2</sup>  | 5         |
| CuNi@NiFeCu                                                       | 1.0 M KOH                       | 10                                 | 1.51             | 1.95 mg cm <sup>-2</sup> | 6         |
| CuO <sub>x</sub> @Co <sub>3</sub> O <sub>4</sub> NRs/CF           | 1.0 M KOH                       | 10                                 | 1.60             | N/A                      | 7         |
| Pt-Cu@Cu <sub>x</sub> O NWs                                       | 1.0 M KOH                       | 10                                 | 1.56             | 18.9 mg cm <sup>-2</sup> | 1         |
| Cu-Ni <sub>3</sub> S <sub>2</sub> /Co <sub>3</sub> S <sub>4</sub> | 1.0 M KOH                       | 10                                 | 1.49             | N/A                      | 9         |
| Cu@CoS <sub>x</sub> /CF                                           | 1.0 M KOH                       | 10                                 | 1.50             | 3.9 mg cm <sup>-2</sup>  | 10        |
| Cu <sub>3</sub> N@CoNiCHs/CF                                      | 1.0 M KOH                       | 10                                 | 1.58             | 6.23 mg cm <sup>-2</sup> | 11        |
| CuFe <sub>2</sub> O <sub>4</sub>                                  | 1.0 M KOH                       | 10                                 | 1.62             | 1.66 mg cm <sup>-2</sup> | 12        |
| Cu-Foam@CuCoNC-500                                                | 1.0 M KOH                       | 10                                 | 1.52             | N/A                      | 13        |
|                                                                   | 1.0 M                           |                                    |                  |                          |           |
| Cu-CoP NAs/CP                                                     | PBS (Phosphate Buffer Solution) | 10                                 | 1.72             | 3.95 mg cm <sup>-2</sup> | 14        |
| CoNiMo <sub>4</sub> -                                             | 1.0 M KOH                       | 50                                 | 1.53             | N/A                      | 15        |

|                                                                 |                |    |      |                          |    |  |
|-----------------------------------------------------------------|----------------|----|------|--------------------------|----|--|
| 21/CuO <sub>x</sub> /CF                                         |                |    |      |                          |    |  |
| Fe-Ni <sub>2</sub> P@PC/Cu <sub>x</sub> S                       | 1.0 M KOH      | 10 | 1.62 | 2.2 mg cm <sup>-2</sup>  | 16 |  |
| Cu-(a-NiSe <sub>x</sub> /c-NiSe <sub>2</sub> )/TiO <sub>2</sub> | 1.0 M KOH      | 10 | 1.62 | 1.5 mg cm <sup>-2</sup>  | 17 |  |
| Co-Cu-W                                                         | 1.0 M KOH      | 10 | 1.80 | 1.25 mg cm <sup>-2</sup> | 18 |  |
| NiFeO <sub>x</sub> @NiCu                                        | 1.0 M KOH      | 10 | 1.67 | 0.4 mg cm <sup>-2</sup>  | 19 |  |
|                                                                 | 1.0 M          |    |      |                          |    |  |
| 1D-Cu@Co-CoO/Rh                                                 | KOH+0.5 M NaCl | 10 | 1.60 | N/A                      | 20 |  |
|                                                                 | 1.0 M          |    |      |                          |    |  |
| NiP <sub>2</sub> -FeP <sub>2</sub> / Cu-NW / Cu-f               | KOH+0.5 M NaCl | 10 | 1.40 | N/A                      | 21 |  |
|                                                                 | 1.0 M KOH      | 10 | 1.47 | N/A                      | 22 |  |

---

## References

1. S. Zhao, J. Huang, Y. Liu, J. Shen, H. Wang, X. Yang, Y. Zhu and C. Li, *J Mater Chem A*, 2017, **5**, 4207-4214.
2. L. Yu, H. Zhou, J. Sun, F. Qin, F. Yu, J. Bao, Y. Yu, S. Chen and Z. Ren, *Energ Environ Sci*, 2017, **10**, 1820-1827.
3. H. Shi, T. Dai, W. Wan, Z. Wen, X. Lang and Q. Jiang, *Adv Funct Mater*, 2021, **31**, 2102285.
4. Q. Yao, B. Huang, N. Zhang, M. Sun, Q. Shao and X. Huang, *Angew Chem Int Edit*, 2019, **58**, 13983-13988.
5. Q. Ouyang, Z. Lei, Q. Li, M. Li and C. Yang, *J Mater Chem A*, 2021, **9**, 14466-14476.
6. D. Cao, H. Xu and D. Cheng, *Appl Catal B-Environ*, 2021, **298**, 120600.
7. Q. Zhou, T. Li, J. Qian, Y. Hu, F. Guo and Y. Zheng, *J Mater Chem A*, 2018, **6**, 14431-14439.
8. T. Duy Thanh, L. Huu Tuan, D. Thi Luu Luyen, N. H. Kim and J. H. Lee, *Nano Energy*, 2019, **59**, 216-228.
9. H. Su, S. Song, S. Li, Y. Gao, L. Ge, W. Song, T. Ma and J. Liu, *Appl Catal B-Environ*, 2021, **293**, 120225.
10. Y. Liu, Q. Li, R. Si, G. Li, W. Li, D. Liu, D. Wang, L. Sun, Y. Zhang and X. Zou, *Adv Mater*, 2017, **29**, 1606200.
11. S. Liu, M. Gao, S. Liu and J. Luo, *Appl Catal B-Environ*, 2021, **292**, 120148.
12. V. Sharma, U. N. Pan, T. I. Singh, A. K. Das, N. H. Kim and J. H. Lee, *Chem*



- Eng J*, 2021, **415**, 127779.
13. H. Sun, Q. Li, Y. Lian, C. Zhang, P. Qi, Q. Mu, H. Jin, B. Zhang, M. Chen, Z. Deng and Y. Peng, *Appl Catal B-Environ*, 2020, **263**, 118139.
  14. L. Yan, B. Zhang, J. Zhu, Y. Li, P. Tsiakaras and P. K. Shen, *Appl Catal B-Environ*, 2020, **265**, 118555.
  15. M. Gu, X. Deng, M. Lin, H. Wang, A. Gao, X. Huang and X. Zhang, *Adv Energy Mater*, 2021, **11**, 2102361.
  16. D. T. Tran, H. T. Le, V. H. Hoa, N. H. Kim and J. H. Lee, *Nano Energy*, 2021, **84**, 105861.
  17. K. R. Park, D. T. Tran, T. T. Nguyen, N. H. Kim and J. H. Lee, *Chem Eng J*, 2021, **422**, 130048.
  18. D. Gao, R. Liu, J. Biskupek, U. Kaiser, Y. Song and C. Streb, *Angew Chem Int Edit*, 2019, **58**, 4644-4648.
  19. Y. Zhou, Z. Wang, Z. Pan, L. Liu, J. Xi, X. Luo and Y. Shen, *Adv Mater*, 2019, **31**, 1806769.
  20. T. Phan Khanh Linh, T. Duy Thanh, D. Malhotra, S. Prabhakaran, D. H. Kim, N. H. Kim and J. H. Lee, *Small*, 2021, **17**, 2103826.
  21. A. Kumar, V. Q. Bui, J. Lee, A. R. Jadhav, Y. Hwang, M. G. Kim, Y. Kawazoe and H. Lee, *ACS Energy Lett*, 2021, **6**, 354-363.
  22. K. Yang, P. Xu, Z. Lin, Y. Yang, P. Jiang, C. Wang, S. Liu, S. Gong, L. Hu and Q. Chen, *Small*, 2018, **14**, 1803009.
